# Supplementary material for: Nanowires exfoliated from one-dimensional van der Waals transition metal trihalides and quadrihalides
Source: Royal Society of Chemistry journal article supplement (doi:10.1039/d2na00877g), 2023-01-01
Supplement: d2na00877g1.pdf [file d2na00877g1.pdf]

# Electronic supplementary information: Nanowires exfoliated from one-dimensional van der Waals transition metal trihalides and quadrihalides

Chuanxun Su<sup>\*,†,‡</sup> and Lixin He<sup>\*,†,‡</sup>

<sup>†</sup>*CAS Key Laboratory of Quantum Information, University of Science and Technology of  
China, Hefei, Anhui, 230026, People's Republic of China*

<sup>‡</sup>*Synergetic Innovation Center of Quantum Information and Quantum Physics, University  
of Science and Technology of China, Hefei, 230026, People's Republic of China*

E-mail: [sucx@ustc.edu.cn](mailto:sucx@ustc.edu.cn); [helx@ustc.edu.cn](mailto:helx@ustc.edu.cn)

## Structure prototype analysis package

The Structure Prototype Analysis Package (SPAP)<sup>1</sup> is a tool for analyzing the symmetry and similarity of different atomic structures. It is capable of clustering large amounts of atomic structures based on physical features such as symmetry, composition type, and structural distance. SPAP enables the identification of structures in a database that are similar to a target structure. This open-source package is available at:

<https://github.com/chuanxun/StructurePrototypeAnalysisPackage>.

The procedure for querying similar structures in the database involves four steps: (1) selecting structures with the target composition type; (2) adjusting the atom number density of the selected structures to match that of the target structure; (3) calculating the CCFs of the structures and evaluating the distances between the CCFs of the target structure and the

selected structures; (4) ranking the structures in ascending order based on their structural distances. In step 2, we can construct an atom number density normalization coefficient

$$c_{\text{bulk}} = \sqrt[3]{\frac{N_s}{V_s \rho_t}}, \quad (\text{S1})$$

where  $N_s$ ,  $V_s$ , and  $\rho_t$  denote the total number of atoms for the selected structure, the volume of the selected structure, and the atom number density of the target structure, respectively. We multiply the 3 lattice vectors of the selected structure by  $c_{\text{bulk}}$  and the fractional coordinates of the atoms of the selected structure should be kept unchanged. A comparison between structures then reduces to a comparison of the respective  $\text{ccf}_{ij}(r)$ . We utilize the Pearson correlation coefficient to measure the degree of similarity between  $\text{ccf}_{ij}^A(r)$  and  $\text{ccf}_{ij}^B(r)$  from structure  $A$  and  $B$ , respectively. The Pearson correlation coefficient is calculated for discrete points  $r_k$  within the range of 0–10 Å and  $r_{\text{cut}} = 9$  Å,

$$R_{ij} = \frac{\sum_{r_k} [\text{ccf}_{ij}^A(r_k) - \overline{\text{ccf}_{ij}^A}] [\text{ccf}_{ij}^B(r_k) - \overline{\text{ccf}_{ij}^B}]}{\sqrt{\sum_{r_k} [\text{ccf}_{ij}^A(r_k) - \overline{\text{ccf}_{ij}^A}]^2} \sqrt{\sum_{r_k} [\text{ccf}_{ij}^B(r_k) - \overline{\text{ccf}_{ij}^B}]^2}}, \quad (\text{S2})$$

where  $\overline{\text{ccf}_{ij}^A}$  and  $\overline{\text{ccf}_{ij}^B}$  represent the average values of  $\text{ccf}_{ij}^A(r_k)$  and  $\text{ccf}_{ij}^B(r_k)$ , respectively. However, Eq. S2 is problematic if  $\text{ccf}_{ij}^A(r)$  or  $\text{ccf}_{ij}^B(r)$  equals a constant. From the definition of the CCF we can see that if  $\text{ccf}_{ij}(r) = C$ , then  $\text{ccf}_{ij}(r) = 0$ . If a structure has many different types of elements or  $r_{\text{cut}}$  is small, it is possible that  $\text{ccf}_{ij}(r) = 0$  occurs. Table S1 shows how we evaluate  $R_{ij}$  for such cases. The distance between  $\text{ccf}_{ij}^A(r)$  and  $\text{ccf}_{ij}^B(r)$  can be defined as  $d_{ij} = 1 - R_{ij}$ . It can be deduced from the definition of CCF that

$$\text{ccf}_{ij}(r) = \text{ccf}_{ji}(r). \quad (\text{S3})$$

Only  $\text{ccf}_{ij}(r)$  with  $i \leq j$  needs to be calculated and  $d_{ij} = d_{ji}$ . The summation of  $d_{ij}$  with their respective weight factors yields the distance between structures  $A$  and  $B$ .

Table S1: Evaluation of  $R_{ij}$  when  $\text{ccf}_{ij}^A(r) = 0$  or  $\text{ccf}_{ij}^B(r) = 0$ .

| $\sum_{r_k} [\text{ccf}_{ij}^A(r_k) - \overline{\text{ccf}_{ij}^A}]^2$ | $\sum_{r_k} [\text{ccf}_{ij}^B(r_k) - \overline{\text{ccf}_{ij}^B}]^2$ | $R_{ij}$ |
|------------------------------------------------------------------------|------------------------------------------------------------------------|----------|
| 0                                                                      | 0                                                                      | 1        |
| 0                                                                      | Non-zero                                                               | 0        |
| Non-zero                                                               | 0                                                                      | 0        |

## Total energies for different magnetic configurations

Table S2 shows the total energies of the structures under different magnetic configurations. Various initial magnetizations are applied to obtain different final magnetic states. However, it should be noted that in some compounds such as  $\text{TiI}_3$ , the systems converge to non-magnetic (NM) states even though the initial states are magnetic.

Table S2: Final magnetization and converged total energies ( $E$ ) for different initial magnetic configurations.

| Compound              | Space group  | System    | Initial magnetism | Final magnetism | $E$ (eV/atom) |
|-----------------------|--------------|-----------|-------------------|-----------------|---------------|
| $\text{TiI}_3$        | $Pm\bar{m}n$ | Bulk      | NM                | NM              | 0.0000        |
| $\text{TiI}_3$        | $Pm\bar{m}n$ | Bulk      | FM                | NM              | 0.0000        |
| $\text{TiI}_3$        | $Pm\bar{m}n$ | Bulk      | AFM               | NM              | 0.0000        |
| $\text{TiI}_3$        |              | 1-chain   | NM                | NM              | 0.1643        |
| $\text{TiI}_3$        |              | 1-chain   | FM                | NM              | 0.1643        |
| $\text{TiI}_3$        |              | 1-chain   | AFM               | NM              | 0.1643        |
| $\text{TiI}_3$        |              | 3-chain   | NM                | NM              | 0.1114        |
| $\text{TiI}_3$        |              | 3-chain   | FM                | NM              | 0.1113        |
| $\text{TiI}_3$        |              | 7-chain   | NM                | NM              | 0.0725        |
| $\beta\text{-TiCl}_3$ | $Pm\bar{m}n$ | Bulk      | NM                | NM              | 0.0000        |
| $\beta\text{-TiCl}_3$ | $Pm\bar{m}n$ | Bulk      | FM                | NM              | 0.0000        |
| $\beta\text{-TiCl}_3$ | $Pm\bar{m}n$ | Bulk      | AFM               | NM              | 0.0000        |
| $\text{TiCl}_3$       |              | 1-chain   | NM                | NM              | 0.1152        |
| $\text{TiCl}_3$       |              | 1-chain   | FM                | NM              | 0.1152        |
| $\text{TiCl}_3$       |              | 1-chain   | AFM               | NM              | 0.1152        |
| $\text{TiCl}_3$       |              | monolayer | NM                | NM              | 0.0792        |
| $\text{TiCl}_3$       |              | monolayer | FM                | NM              | 0.0792        |
| $\text{MoBr}_3$       | $Pm\bar{m}n$ | Bulk      | AFM               | AFM             | 0.0000        |
| $\text{MoBr}_3$       | $Pm\bar{m}n$ | Bulk      | FM                | FM              | 0.0170        |
| $\text{MoBr}_3$       |              | 1-chain   | AFM               | AFM             | 0.1358        |
| $\text{MoBr}_3$       |              | 1-chain   | FM                | FM              | 0.1524        |
| $\beta\text{-RuCl}_3$ | $Pm\bar{m}n$ | Bulk      | NM                | NM              | 0.0000        |
| $\beta\text{-RuCl}_3$ | $Pm\bar{m}n$ | Bulk      | FM                | NM              | -0.0002       |

Continued on next page

Continued

| Compound                   | Space group               | System  | Initial magnetism | Final magnetism | $E$ (eV/atom) |
|----------------------------|---------------------------|---------|-------------------|-----------------|---------------|
| $\beta$ -RuCl <sub>3</sub> | <i>Pmmn</i>               | Bulk    | AFM               | NM              | 0.0000        |
| RuCl <sub>3</sub>          |                           | 1-chain | NM                | NM              | 0.1153        |
| RuCl <sub>3</sub>          |                           | 1-chain | FM                | NM              | 0.1153        |
| RuCl <sub>3</sub>          |                           | 1-chain | AFM               | NM              | 0.1153        |
| RuBr <sub>3</sub>          | <i>Pmmn</i>               | Bulk    | NM                | NM              | 0.0000        |
| RuBr <sub>3</sub>          | <i>Pmmn</i>               | Bulk    | FM                | NM              | -0.0001       |
| RuBr <sub>3</sub>          | <i>Pmmn</i>               | Bulk    | AFM               | NM              | 0.0000        |
| RuBr <sub>3</sub>          |                           | 1-chain | NM                | NM              | 0.1342        |
| RuBr <sub>3</sub>          |                           | 1-chain | FM                | NM              | 0.1342        |
| ZrI <sub>3</sub>           | <i>Pmmn</i>               | Bulk    | NM                | NM              | 0.0000        |
| ZrI <sub>3</sub>           | <i>Pmmn</i>               | Bulk    | FM                | NM              | 0.0000        |
| ZrI <sub>3</sub>           | <i>Pmmn</i>               | Bulk    | AFM               | NM              | 0.0000        |
| ZrI <sub>3</sub>           |                           | 1-chain | NM                | NM              | 0.1636        |
| ZrI <sub>3</sub>           |                           | 1-chain | FM                | NM              | 0.1636        |
| ZrI <sub>3</sub>           |                           | 1-chain | AFM               | NM              | 0.1636        |
| CrI <sub>3</sub>           | <i>P6<sub>3</sub>/mcm</i> | Bulk    | FM                | FM              | 0.0000        |
| CrI <sub>3</sub>           | <i>P6<sub>3</sub>/mcm</i> | Bulk    | AFM               | AFM             | 0.0007        |
| CrI <sub>3</sub>           |                           | 1-chain | AFM               | AFM             | 0.1558        |
| CrI <sub>3</sub>           |                           | 1-chain | FM                | FM              | 0.1560        |
| CrI <sub>3</sub>           |                           | 3-chain | FM                | FM              | 0.1068        |
| CrI <sub>3</sub>           |                           | 3-chain | AFM               | AFM             | 0.1069        |
| CrI <sub>3</sub>           |                           | 7-chain | FM                | FM              | 0.0697        |
| CrI <sub>3</sub>           |                           | 7-chain | AFM               | AFM             | 0.0699        |
| TcBr <sub>3</sub>          | <i>Pmmn</i>               | Bulk    | FM                | FM              | 0.0000        |
| TcBr <sub>3</sub>          | <i>Pmmn</i>               | Bulk    | AFM               | FM              | 0.0000        |
| TcBr <sub>3</sub>          |                           | 1-chain | FM                | FM              | 0.1421        |
| TcBr <sub>3</sub>          |                           | 1-chain | AFM               | FM              | 0.1421        |
| TcBr <sub>4</sub>          | <i>Pbca</i>               | Bulk    | AFM               | AFM             | 0.0000        |
| TcBr <sub>4</sub>          | <i>Pbca</i>               | Bulk    | FM                | FM              | 0.0077        |
| TcBr <sub>4</sub>          |                           | 1-chain | AFM               | AFM             | 0.1394        |
| TcBr <sub>4</sub>          |                           | 1-chain | FM                | FM              | 0.1433        |

## Structure prediction for CrI<sub>3</sub>

We use the big data method (BDM)<sup>1</sup> to search for stable bulk structures in the CrI<sub>3</sub> system. Specifically, the BDM selects out AB<sub>3</sub> structure prototypes from the crystal structure prototype database and substitutes the original element types A and B with Cr and I, re-

spectively. The primitive structures are generated with 1 to 8 formula units and their atom number density is adjusted to  $0.02703 \text{ atom}/\text{\AA}^3$ . We require that the Cr-Cr, Cr-I, and I-I distances need to be larger than  $1.696 \text{ \AA}$ . Structures that do not meet the minimum interatomic distance requirement are discarded. After screening, 214 structures are successfully generated and we relax all the structures via first-principles calculations. The structures are sorted in ascending order according to their lattice energy per atom.

## Electronic band structure and density of states

The electronic band structures and total density of states for 1-chain, 3-chain, and 7-chain  $\text{TiI}_3$  NWs are shown in Fig. S1, S2, and S3, respectively. All the  $\text{TiI}_3$  NWs are semiconductors. The thicker NW has a smaller band gap compared to the thinner NW.

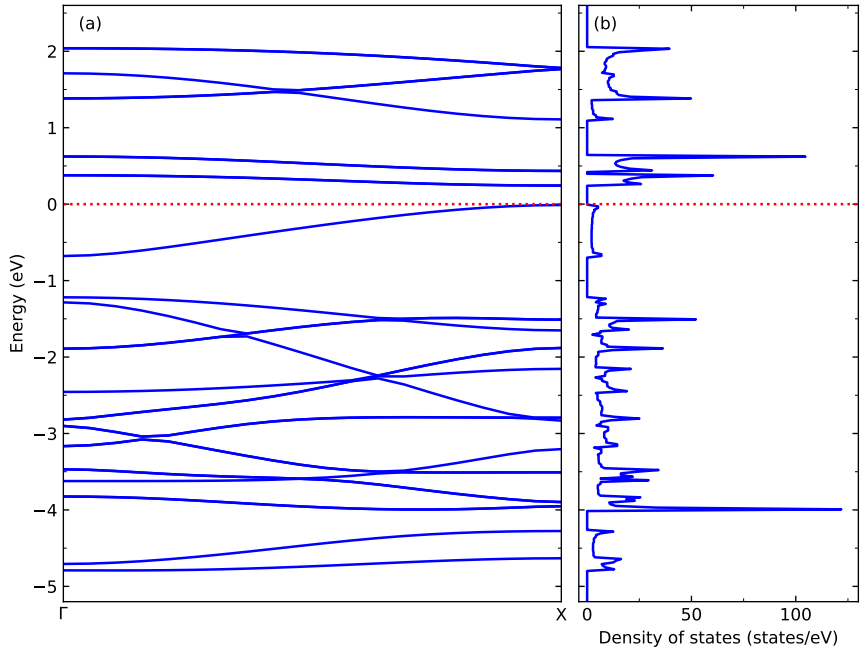

Figure S1: The electronic band structure (a) and total density of states (b) for the 1-chain  $\text{TiI}_3$  NW. The dashed line denotes the Fermi level.

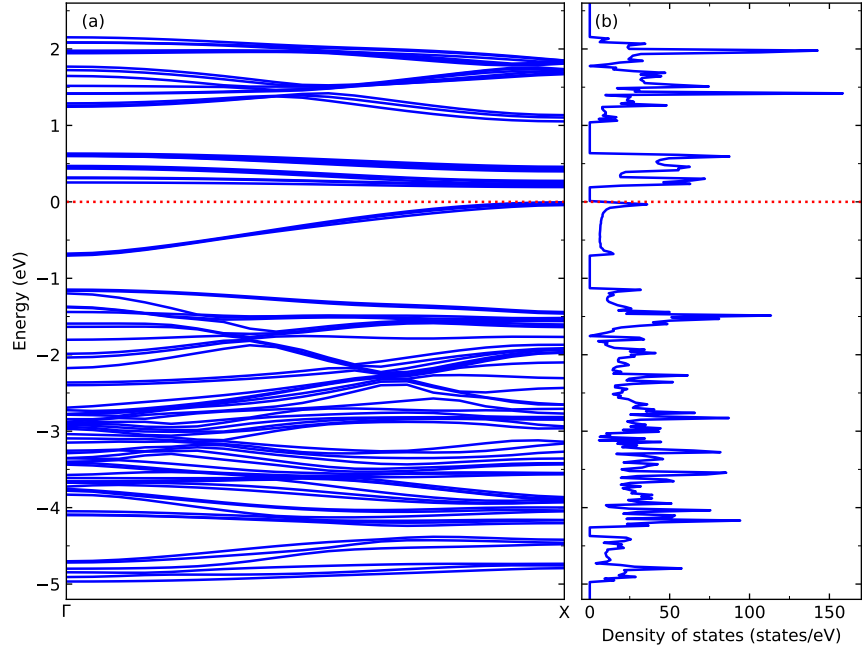

Figure S2: The electronic band structure (a) and total density of states (b) for the 3-chain  $\text{TiI}_3$  NW. The dashed line denotes the Fermi level.

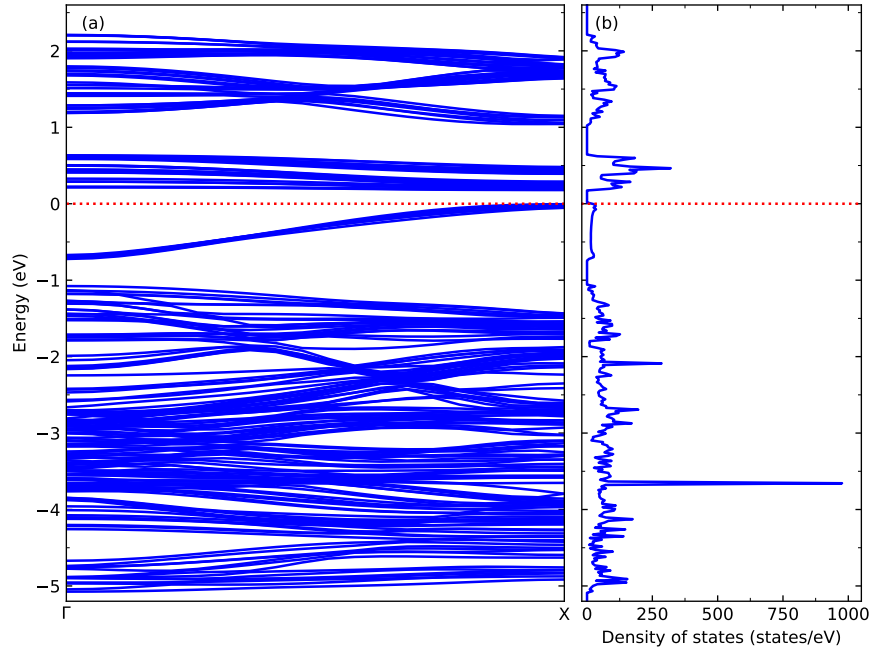

Figure S3: The electronic band structure (a) and total density of states (b) for the 7-chain  $\text{TiI}_3$  NW. The dashed line denotes the Fermi level.

# Phonon spectra

The phonon spectra are calculated using a supercell approach. Figure S4 shows the phonon spectra of bulk  $P6_3/mcm$   $\text{CrI}_3$ . The absence of imaginary phonon frequencies indicates that bulk  $\text{CrI}_3$  is dynamically stable. Figure S5 shows the phonon spectra of the 1-chain  $\text{TiI}_3$ ,  $\text{MoBr}_3$ , and  $\text{RuCl}_3$  NWs, and the 3-chain  $\text{TiI}_3$  and  $\text{CrI}_3$  NWs, and 7-chain  $\text{TiI}_3$  NW. These NWs have no or negligible imaginary phonon frequencies, suggesting that they are dynamically stable. Figure S6 displays the phonon spectra of 1-chain  $\text{RuBr}_3$  and  $\text{ZrI}_3$  NWs, which exhibit small imaginary phonon frequencies, indicating that they are dynamically unstable.

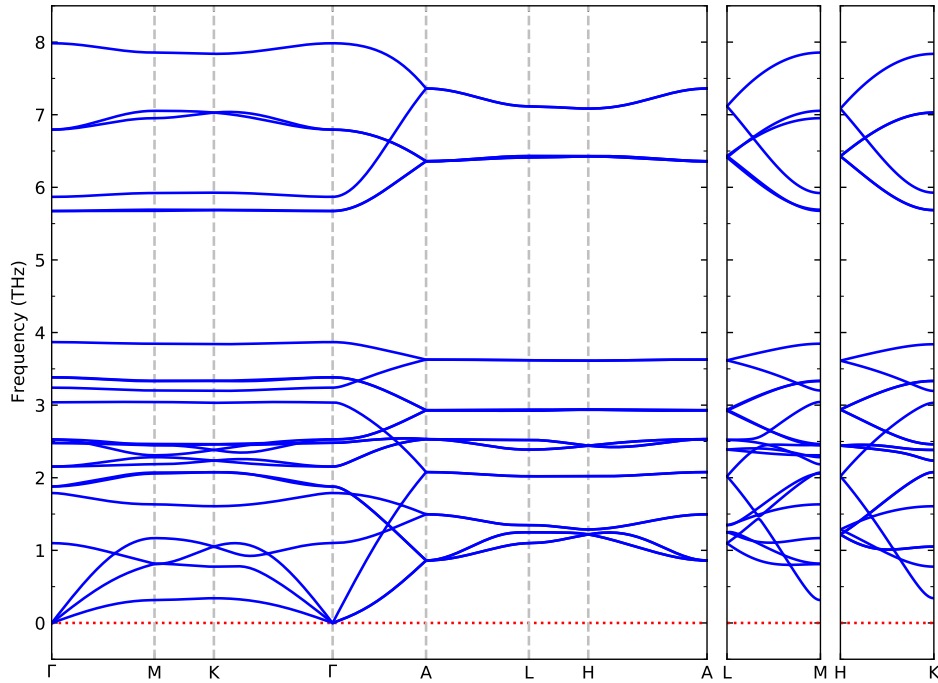

Figure S4: Phonon spectra of bulk  $P6_3/mcm$   $\text{CrI}_3$ .

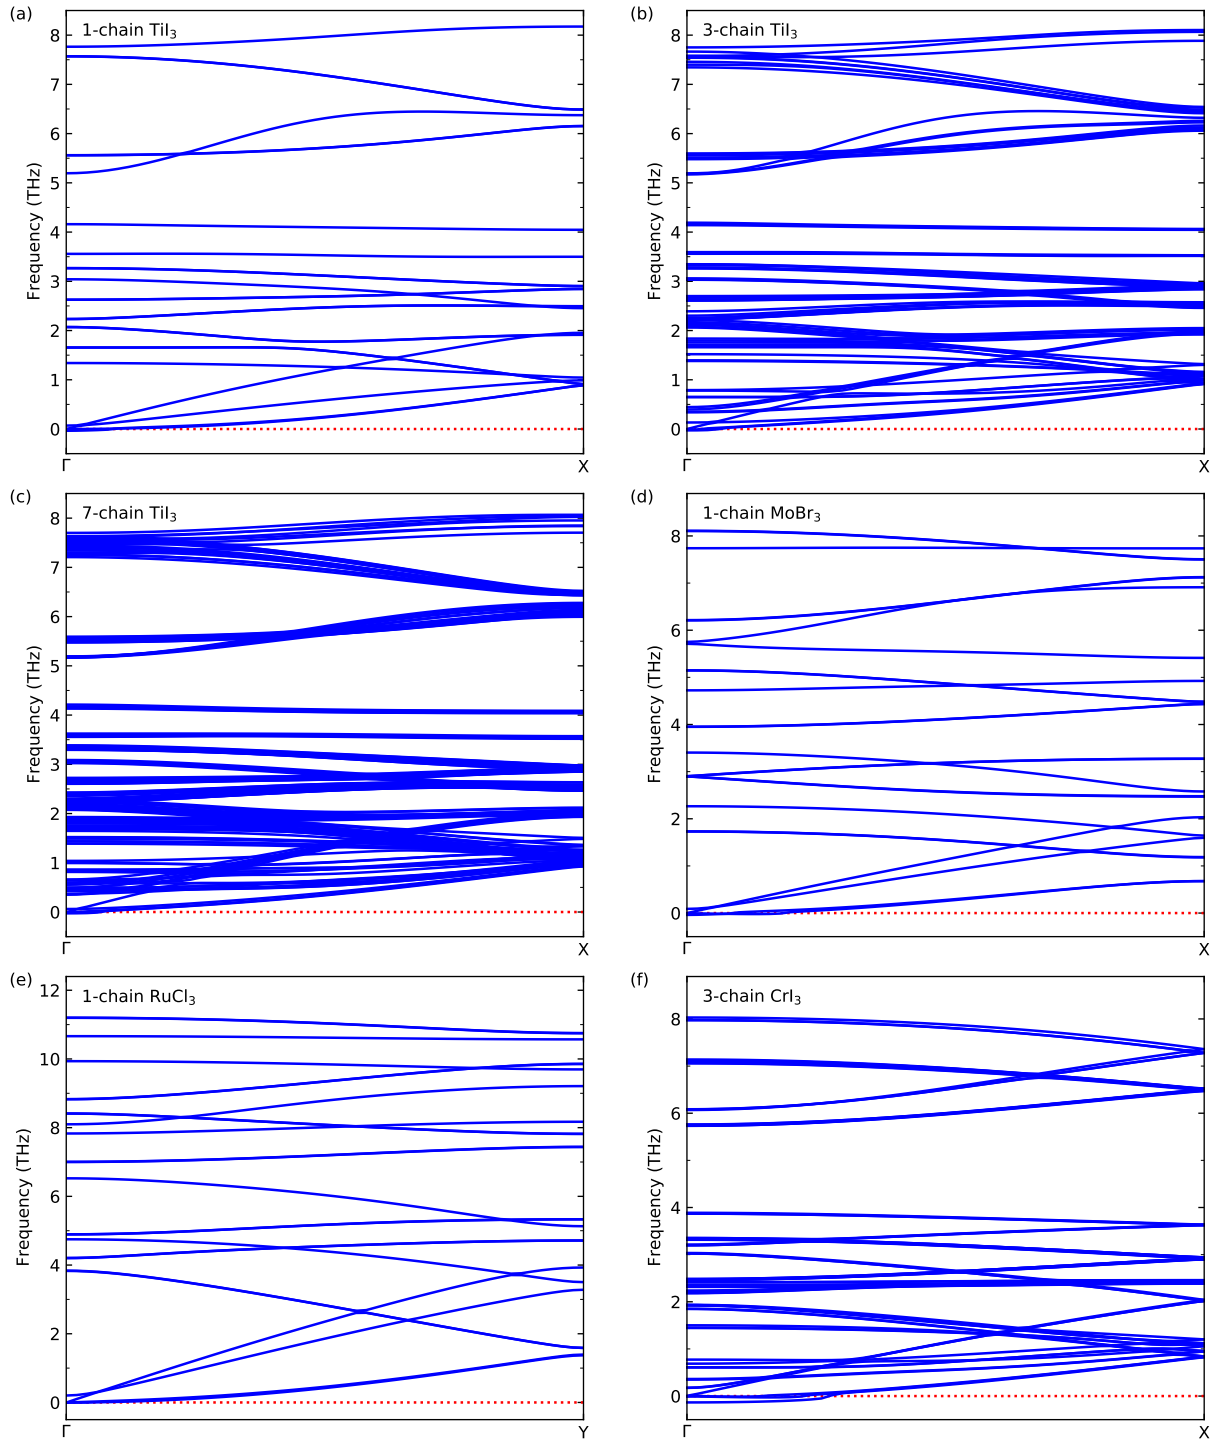

Figure S5: Phonon spectra of the 1-chain  $\text{TiI}_3$  (a), 3-chain  $\text{TiI}_3$  (b), 7-chain  $\text{TiI}_3$  (c), 1-chain  $\text{MoBr}_3$  (d), 1-chain  $\text{RuCl}_3$  (e), 3-chain  $\text{CrI}_3$  (f).



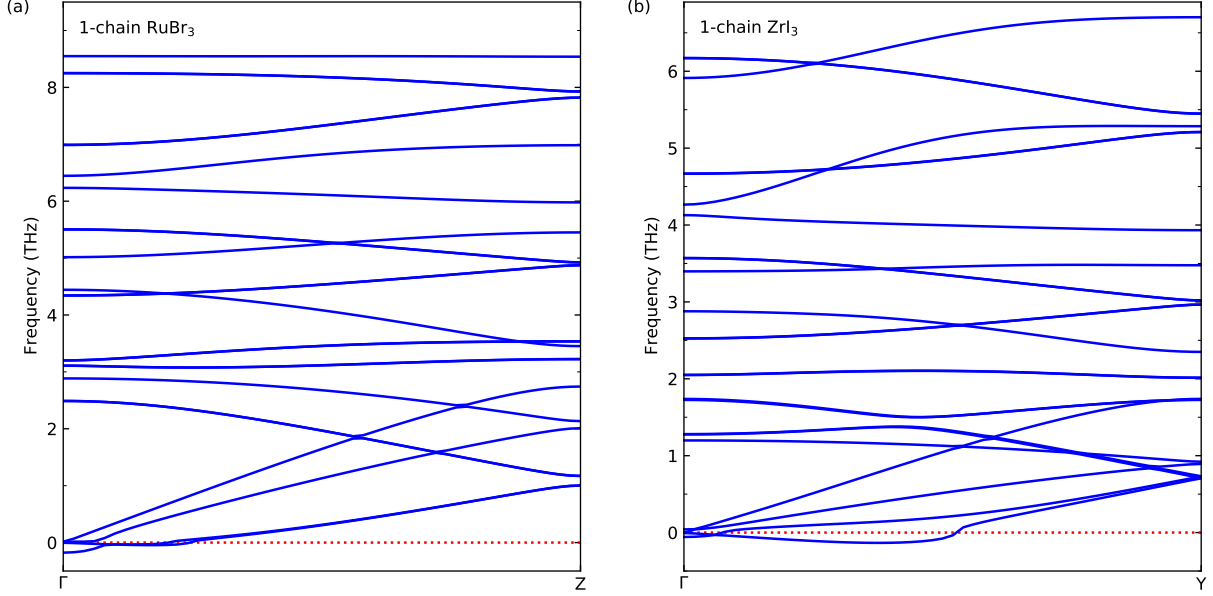

Figure S6: Phonon spectra of the 1-chain  $\text{RuBr}_3$  (a) and 1-chain  $\text{ZrI}_3$  (b).

## *ab initio* molecular dynamics simulations

*Ab initio* molecular dynamics (AIMD) simulations are performed using supercells, which are extended 4 times the unit cell along the atomic chain, at 300 K for 10 ps. Figure S7 shows the CCFs for the relaxed (static) 1-chain  $\text{RuBr}_3$  NW and the averaged CCFs for the AIMD simulated 1-chain  $\text{RuBr}_3$  NWs. Figure S8 shows the CCFs for the relaxed 1-chain  $\text{TcBr}_3$  NW and the averaged CCFs for the AIMD simulated 1-chain  $\text{TcBr}_3$  NWs. The  $\text{ccf}_{ij}^{\text{AIMD}}(r)$  at 300 K still maintains the well organized periodicity, suggesting that the 1-chain  $\text{RuBr}_3$  and  $\text{TcBr}_3$  NWs preserve the crystal structure, even though their phonon spectra have small soft modes near the  $\Gamma$  point.

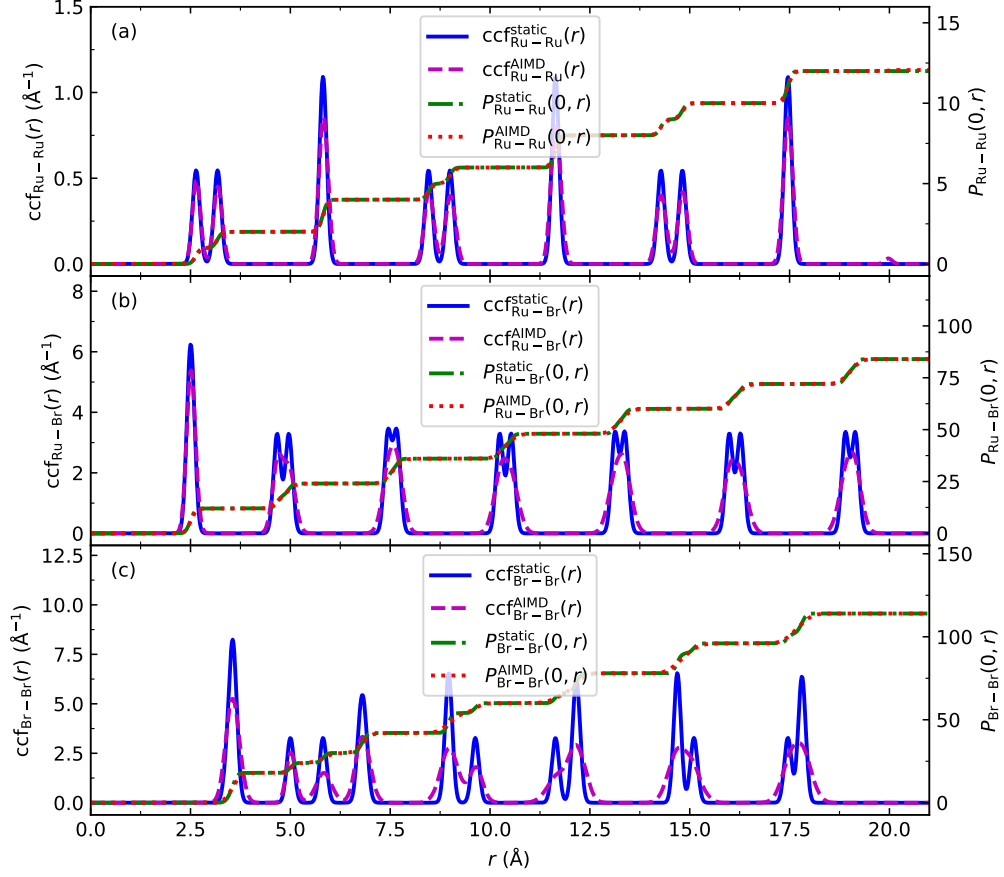

Figure S7: The CCFs for the relaxed 1-chain  $\text{RuBr}_3$  NW and the averaged CCFs for the AIMD simulated 1-chain  $\text{RuBr}_3$  NWs at 300 K in the range of (0.5, 10.0) ps, which are denoted by  $\text{ccf}_{ij}^{\text{static}}(r)$  and  $\text{ccf}_{ij}^{\text{AIMD}}(r)$ , respectively. The corresponding pair functions  $P_{ij}^{\text{static}}(0, r)$  and  $P_{ij}^{\text{AIMD}}(0, r)$  are also shown.

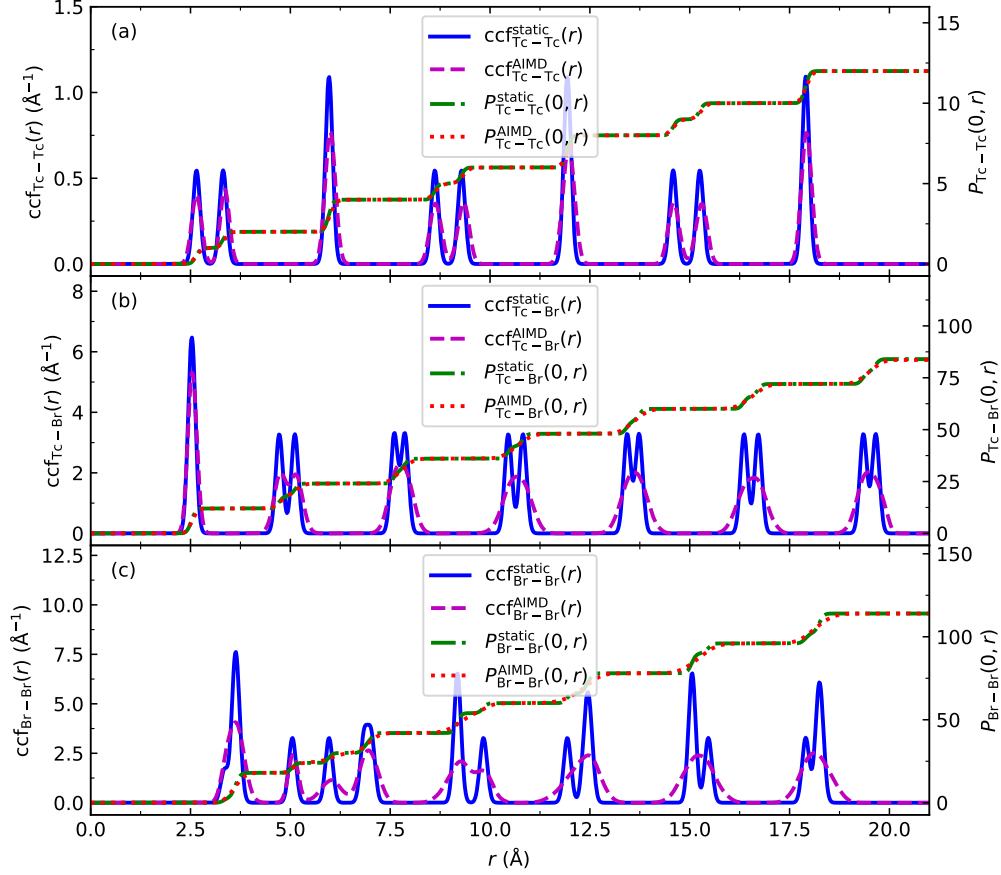

Figure S8: The CCFs for the relaxed 1-chain  $\text{TcBr}_3$  NW and the averaged CCFs for the AIMD simulated 1-chain  $\text{TcBr}_3$  NWs at 300 K in the range of (0.5, 10.0) ps, which are denoted by  $ccf_{ij}^{\text{static}}(r)$  and  $ccf_{ij}^{\text{AIMD}}(r)$ , respectively. The corresponding pair functions  $P_{ij}^{\text{static}}(0, r)$  and  $P_{ij}^{\text{AIMD}}(0, r)$  are also shown.

## References

- (1) Su, C.; Lv, J.; Li, Q.; Wang, H.; Zhang, L.; Wang, Y.; Ma, Y. Construction of crystal structure prototype database: methods and applications. *J. Phys.: Condens. Matter* **2017**, *29*, 165901–165901.
